# Supplementary material for: Cellular and Molecular Immunity to Influenza Viruses and Vaccines
Source: MDPI journal article supplement (doi:10.3390/vaccines12040389), 2024-04-07
Supplement: s1 [file s1]

Figure S1

**Serum IgG from the 2007 study run over a chip with 2006/2007 vaccine on every flow cell**

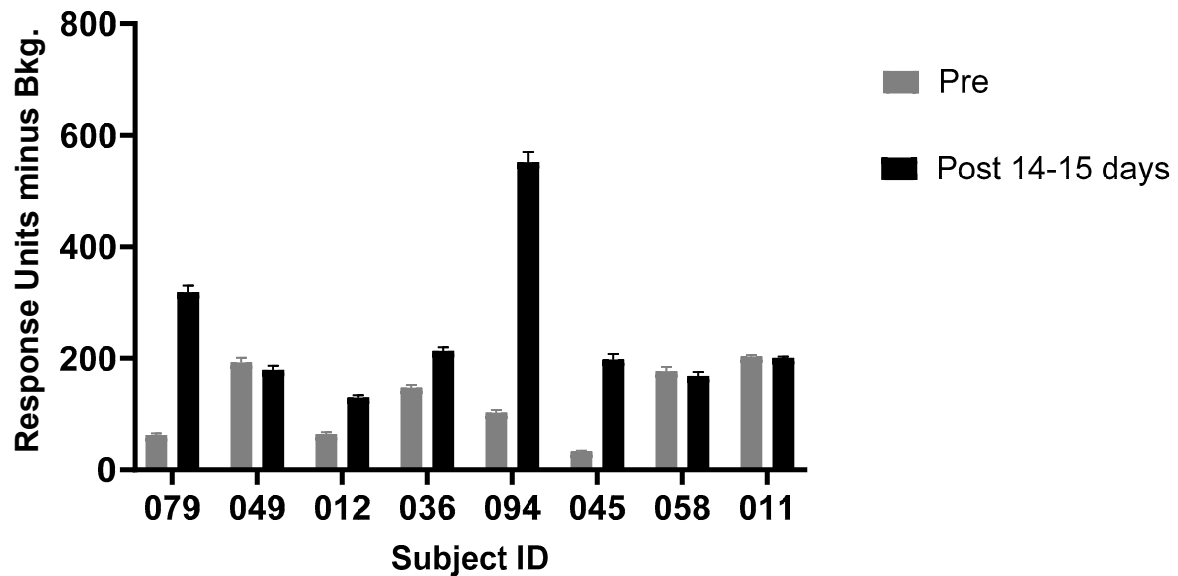

The vaccine from the 2006/2007 season was attached by amine coupling to a CM5 chip at ~5000 units on flow cells, F2, F3, and F4. Flow cell F1 was used as a background binding negative control. Purified IgG (both pre- and post-14-15 days) at 500  $\mu\text{g/ml}$  from each subject was injected over the chip as described in the methods section. Bar graphs represent average RU minus background RU  $\pm$  Standard Error (SE) for each subject.

Figure S2

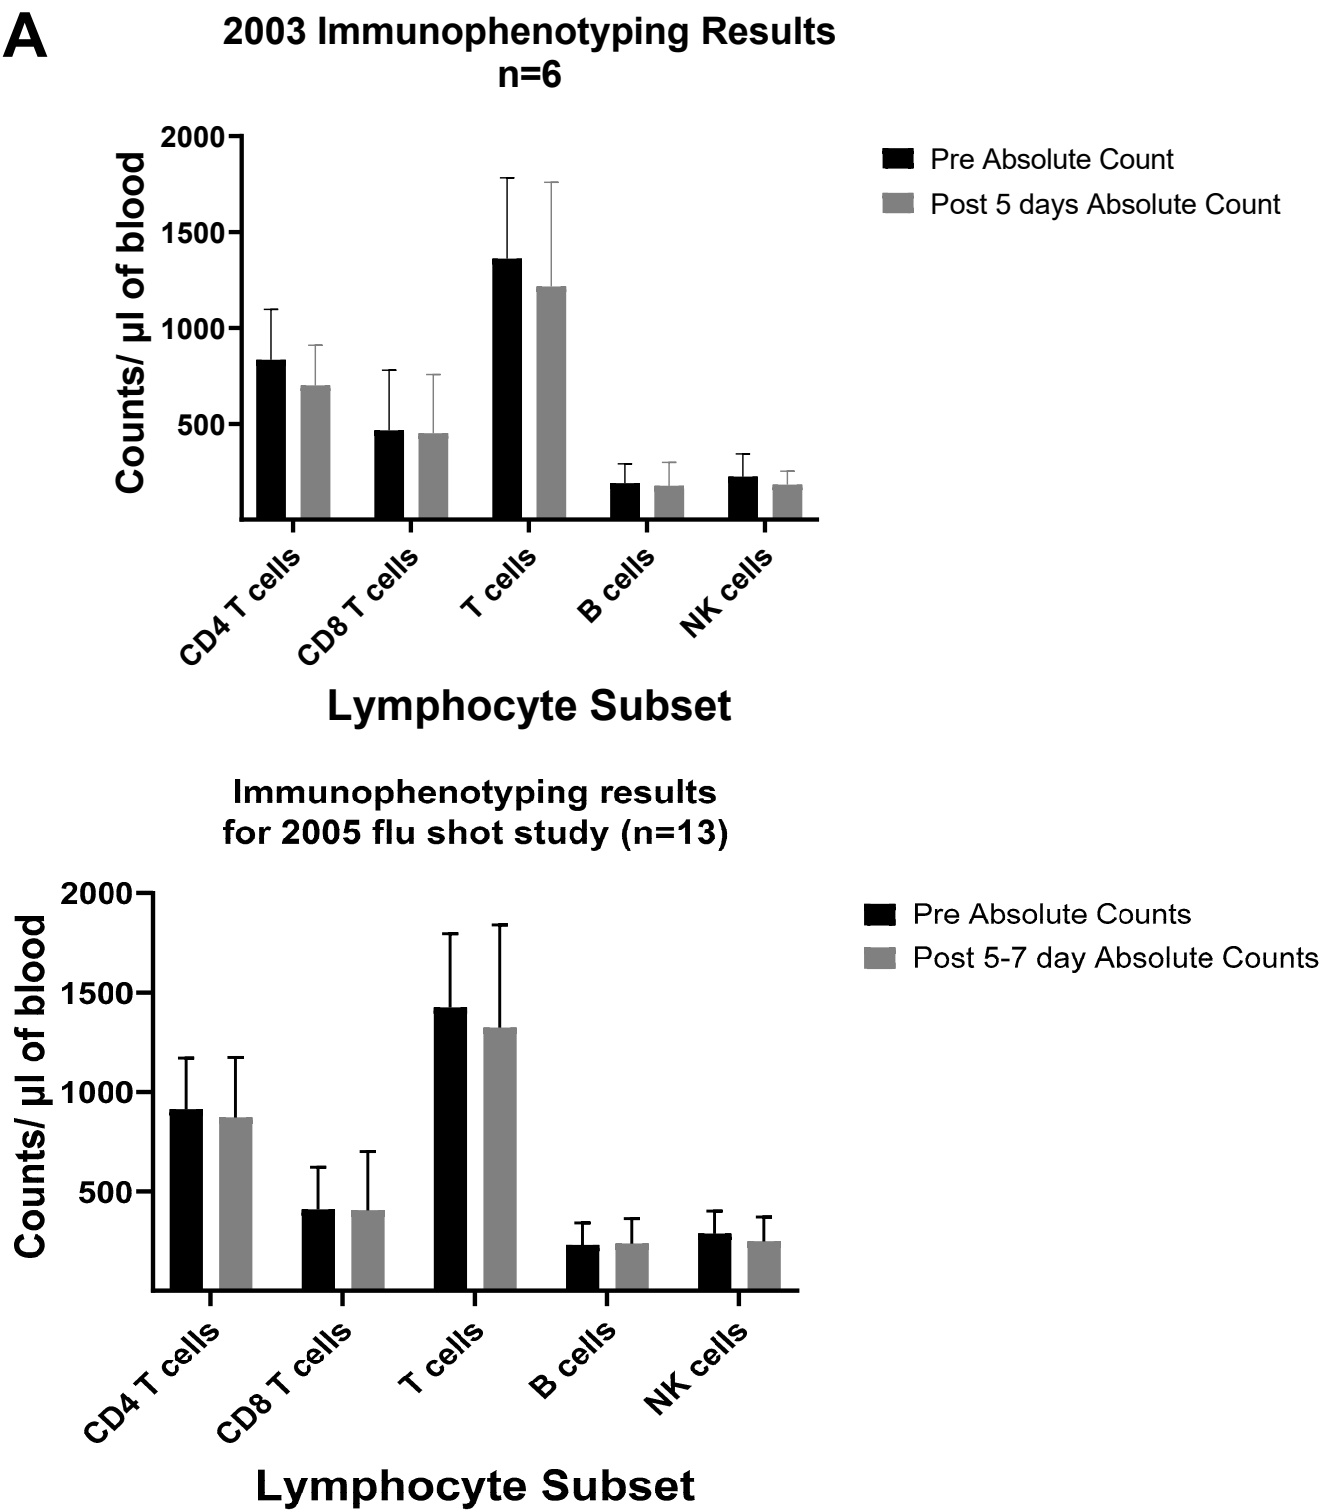

Immunophenotyping results from the 2003/2004 (A) and 2005/2006 (B) flu seasons. Study subjects were immunophenotyped with the 4-color MultiTest reagents with Trucount tubes from BD Biosciences according to the manufacturer's protocol. Stained samples were run and analyzed on a FACSCalibur flow cytometer with MultiSet software v1.1.1 (BD Biosciences, San Jose, CA, USA). Graph bars indicate average counts  $\pm$  SE.

**Figure S3:** Gating Strategy for CD4<sup>+</sup> and CD8<sup>+</sup> T cells, Naive and Memory Cells

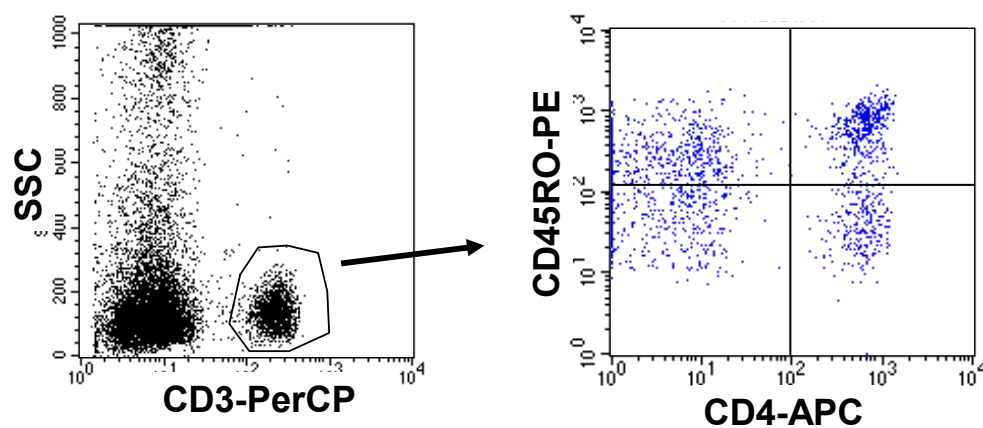

The method for determining the percentage of memory CD4<sup>+</sup> and CD8<sup>+</sup> T cells. In a plot of CD3 versus side scatter the CD3<sup>+</sup> cells are gated upon, and this gate is applied to a plot of CD4<sup>+</sup> versus CD45RO<sup>+</sup> (memory) cells. In this plot the quadrant statistics give the percentages of memory and naïve cells for CD4<sup>+</sup> and CD8<sup>+</sup> T cells. Analysis by CellQuest software v3.3 (BD Biosciences, San Jose, CA, USA).

**Figure S4:** Gating Strategy for HLA-DR<sup>+</sup>/CD38<sup>+</sup>/CD4<sup>+</sup> T cells

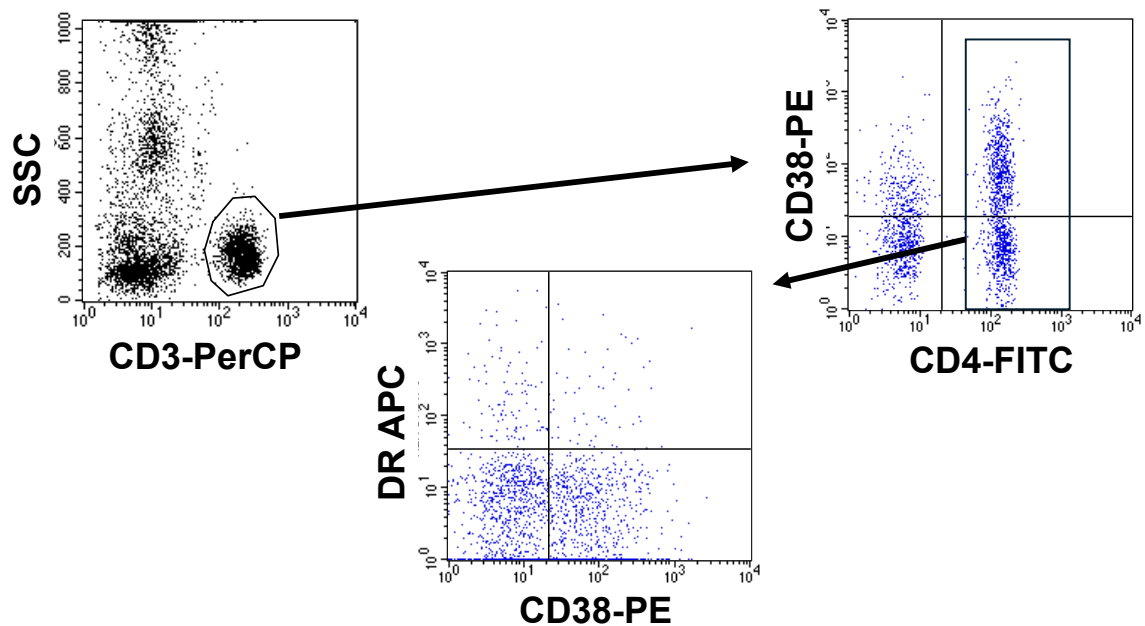

The method for determining the percentage of CD38<sup>+</sup> and HLA-DR<sup>+</sup> CD4<sup>+</sup> T cells. In a plot of CD3<sup>+</sup> versus side scatter the CD3<sup>+</sup> cells are gated upon, and this gate is applied to a plot of CD4<sup>+</sup> versus CD38<sup>+</sup> cells. In this plot the CD4<sup>+</sup> T cells are gated upon, and this gate is applied to a plot of CD38<sup>+</sup> versus HLA-DR<sup>+</sup> cells. Quadrant statistics will give the percentage of CD38<sup>+</sup>/HLA-DR<sup>+</sup>/CD4<sup>+</sup> T cells. Analysis by CellQuest software v3.3.

**Figure S5:** Gating Strategy for CD4<sup>+</sup> T cell Naïve, Effector Memory, and Central Memory Cells

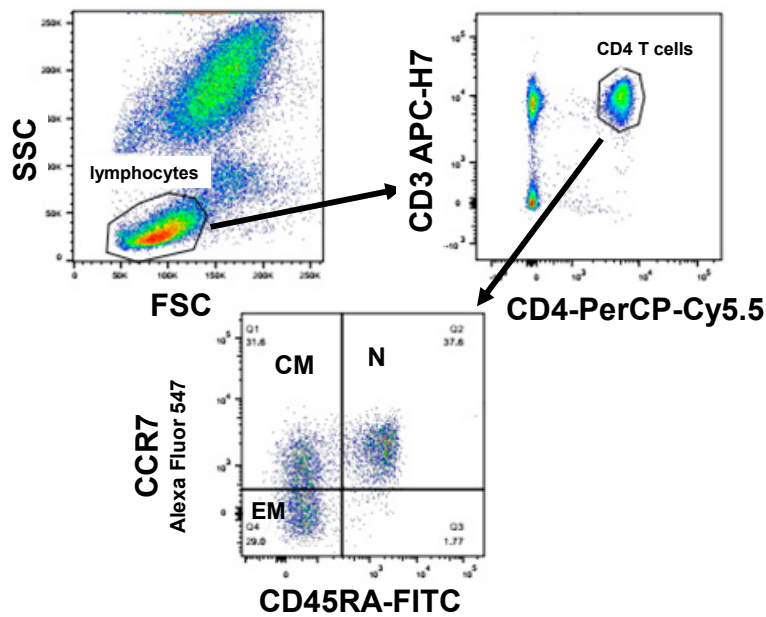

The method for determining the percentage of naïve (N), effector memory (EM), and central memory (CM) CD4<sup>+</sup> T cells. In a plot of forward scatter versus side scatter the lymphocytes are gated upon and this gate was applied to a plot of CD4<sup>+</sup> versus CD3<sup>+</sup> cells. In this plot the CD4<sup>+</sup> T cells were gated. This gate was applied to a plot of CD45RA versus CCR7 to identify naïve (N), effector memory (EM) and central memory cells (CM). The quadrant statistics gave the percentages of each CD4<sup>+</sup> T cell subset. Analysis by FlowJo software v10.7.1\_CL (Tree Star. Inc. Oregon, USA).
